# Supplementary material for: Regulatory mechanisms of anthrax toxin receptor 1-dependent vascular and connective tissue homeostasis
Source: PubMed Central journal article supplement — Matrix Biol. Author manuscript; Available in PMC 2016 Mar 1. (PMC4409530; doi:10.1016/j.matbio.2014.12.002), 2015-01-05
Supplement: NIHMS667648-supplement-Supplemental_Figs_and_Table.pdf [file NIHMS667648-supplement-Supplemental_Figs_and_Table.pdf]

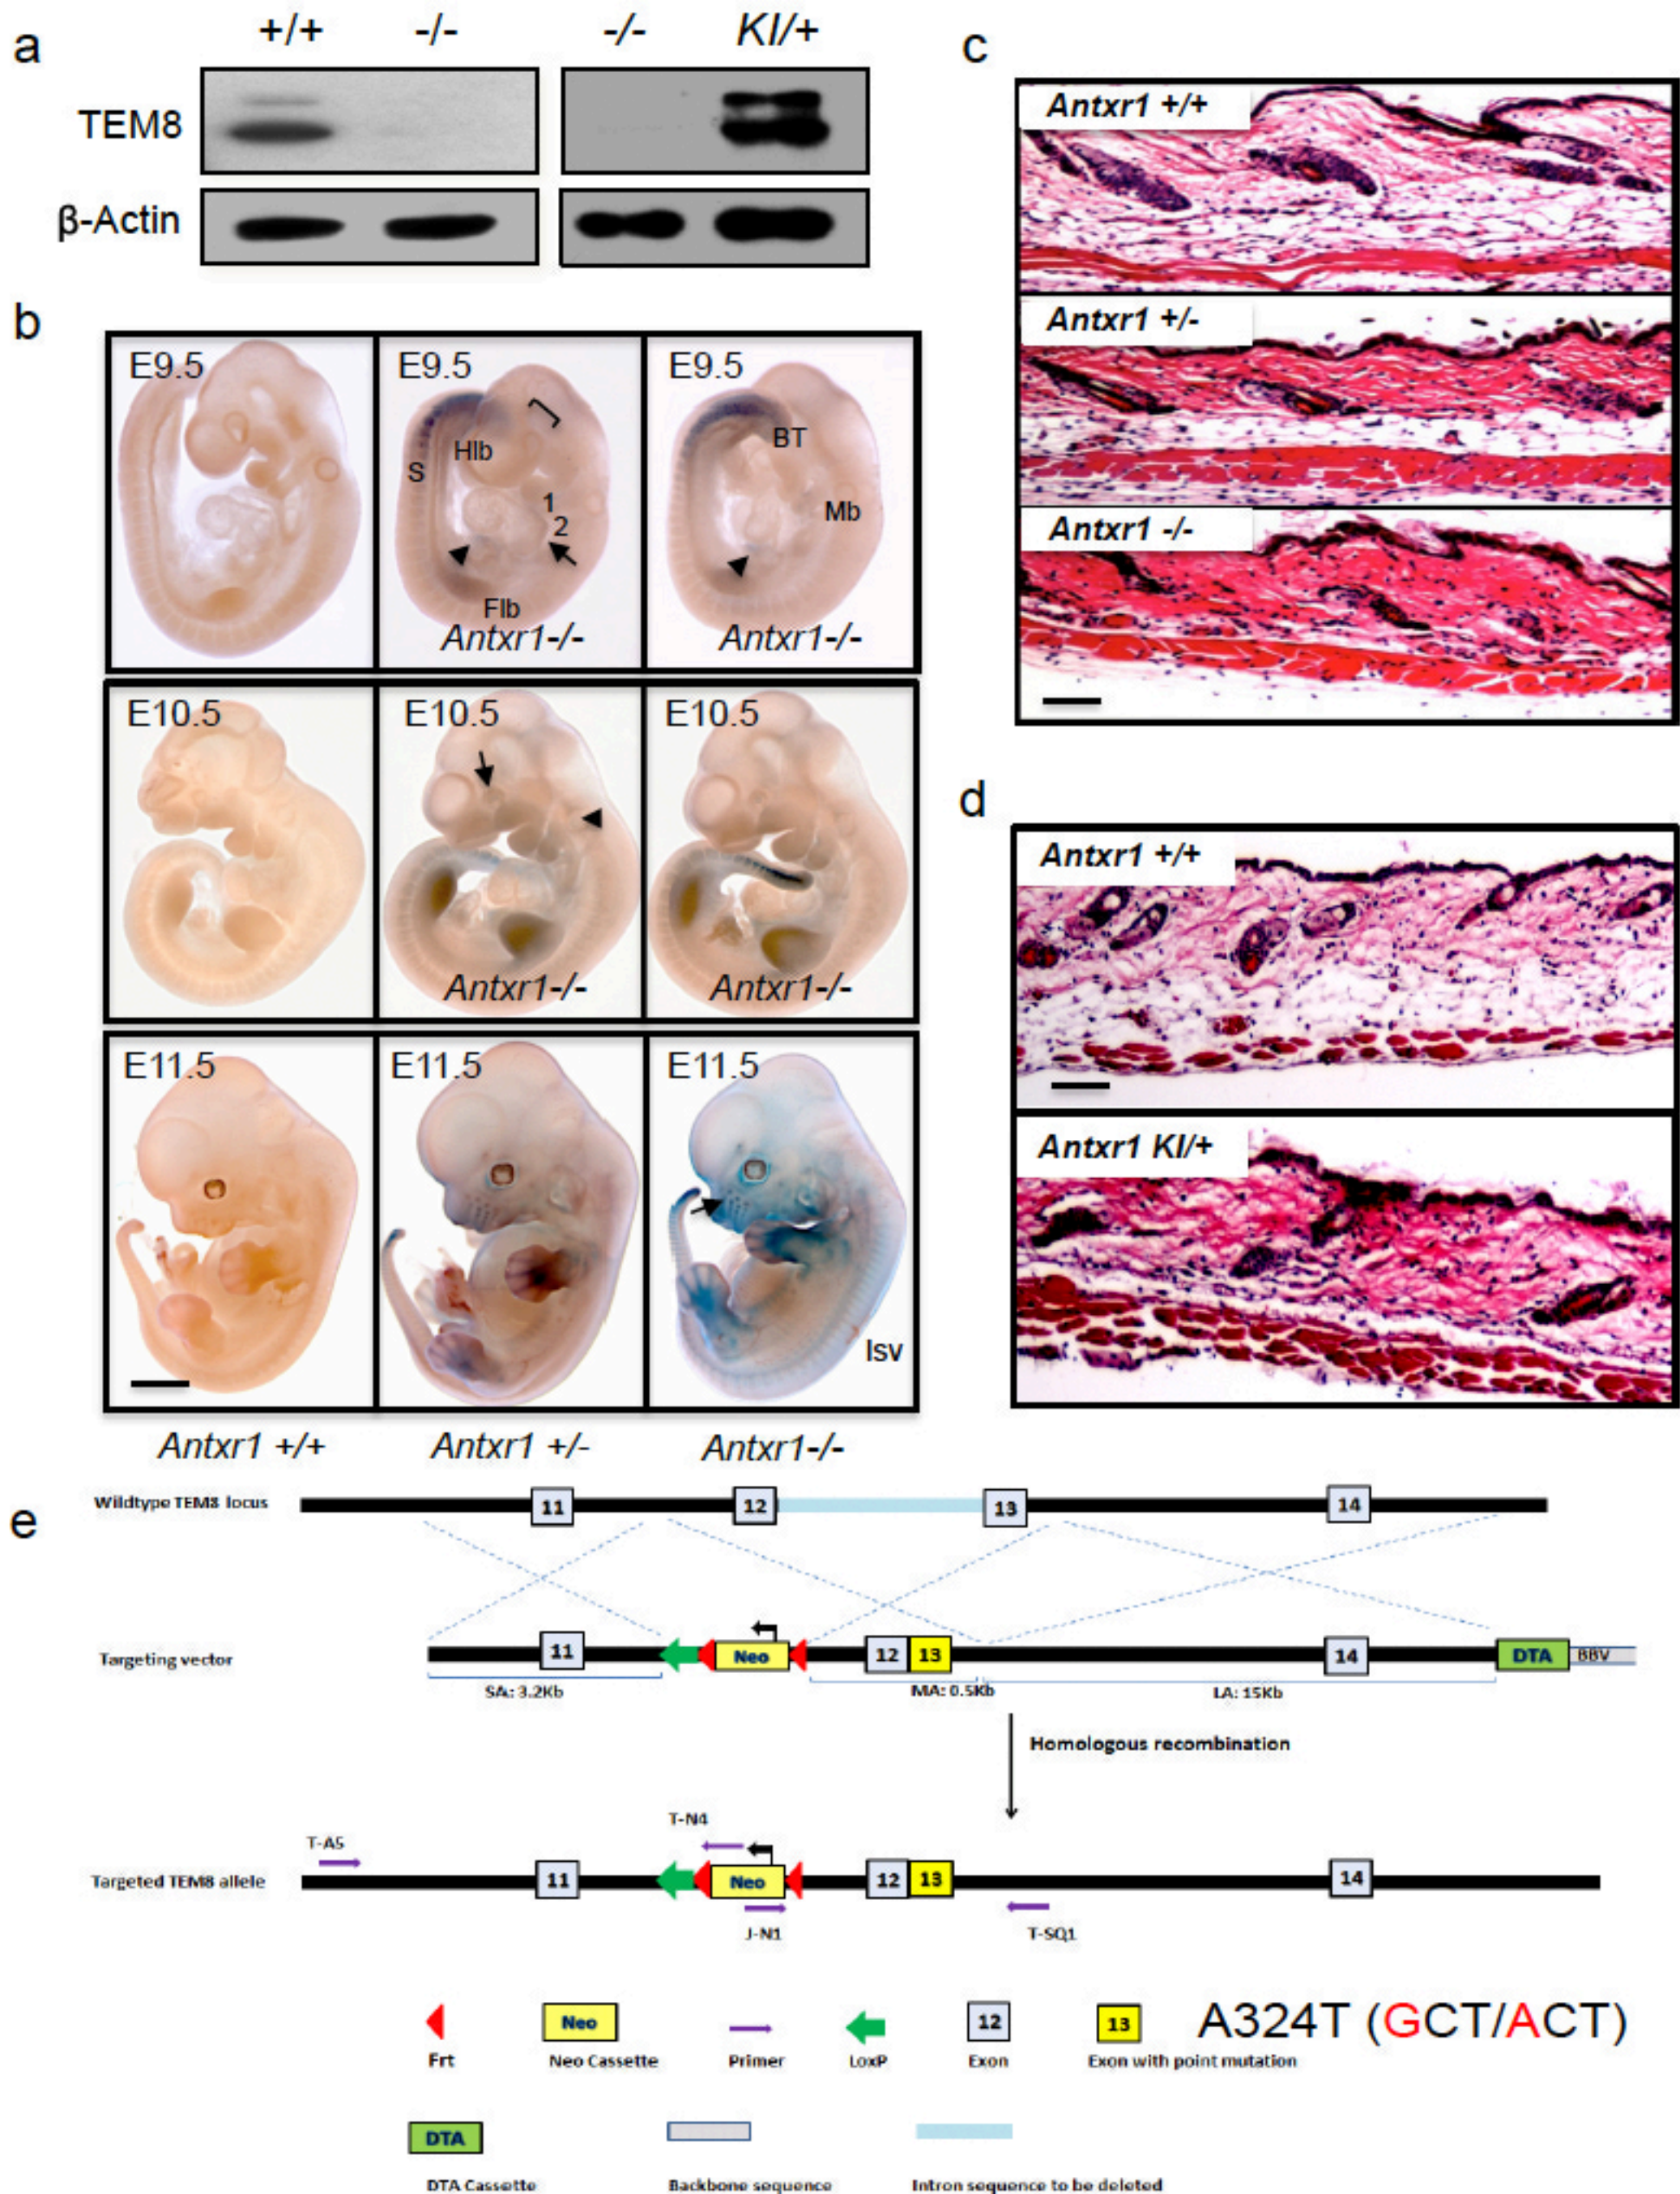

**Supplemental Figure 1: TEM8 protein levels, LacZ staining of embryos, and skin histology of adult animals**  
**(a)** Western-blot of skin lysates of 7-weeks old wild-type (+/+), *Antxr1* -/- and 5-weeks old *KI/+* mice. **(b)** Whole-mount staining of embryos. Indicated at E9.5 are: First and second pharyngeal arches (1 and 2); bud tail (BT); mandible (Mb); somites (S); forelimb (Flb); hindlimb (Hlb); primary head vein (bracket); common atrial chamber (arrow); sinus venosus (arrowhead); at E10.5: Optic vesicle and perioptic vascular plexus (arrow); otic vesicle (arrowhead); at E11.5: Vibrissae (arrow); intersomitic vessels (Isv). Scale bar 1mm. **(c, d)** Representative images of H&E stained 5  $\mu$ m skin sections of mutant and littermate control mice. Scale bars 100  $\mu$ m. **(e)** Diagrams showing the strategy used to generate mice with A324T mutation knocked into *Antxr1* locus.

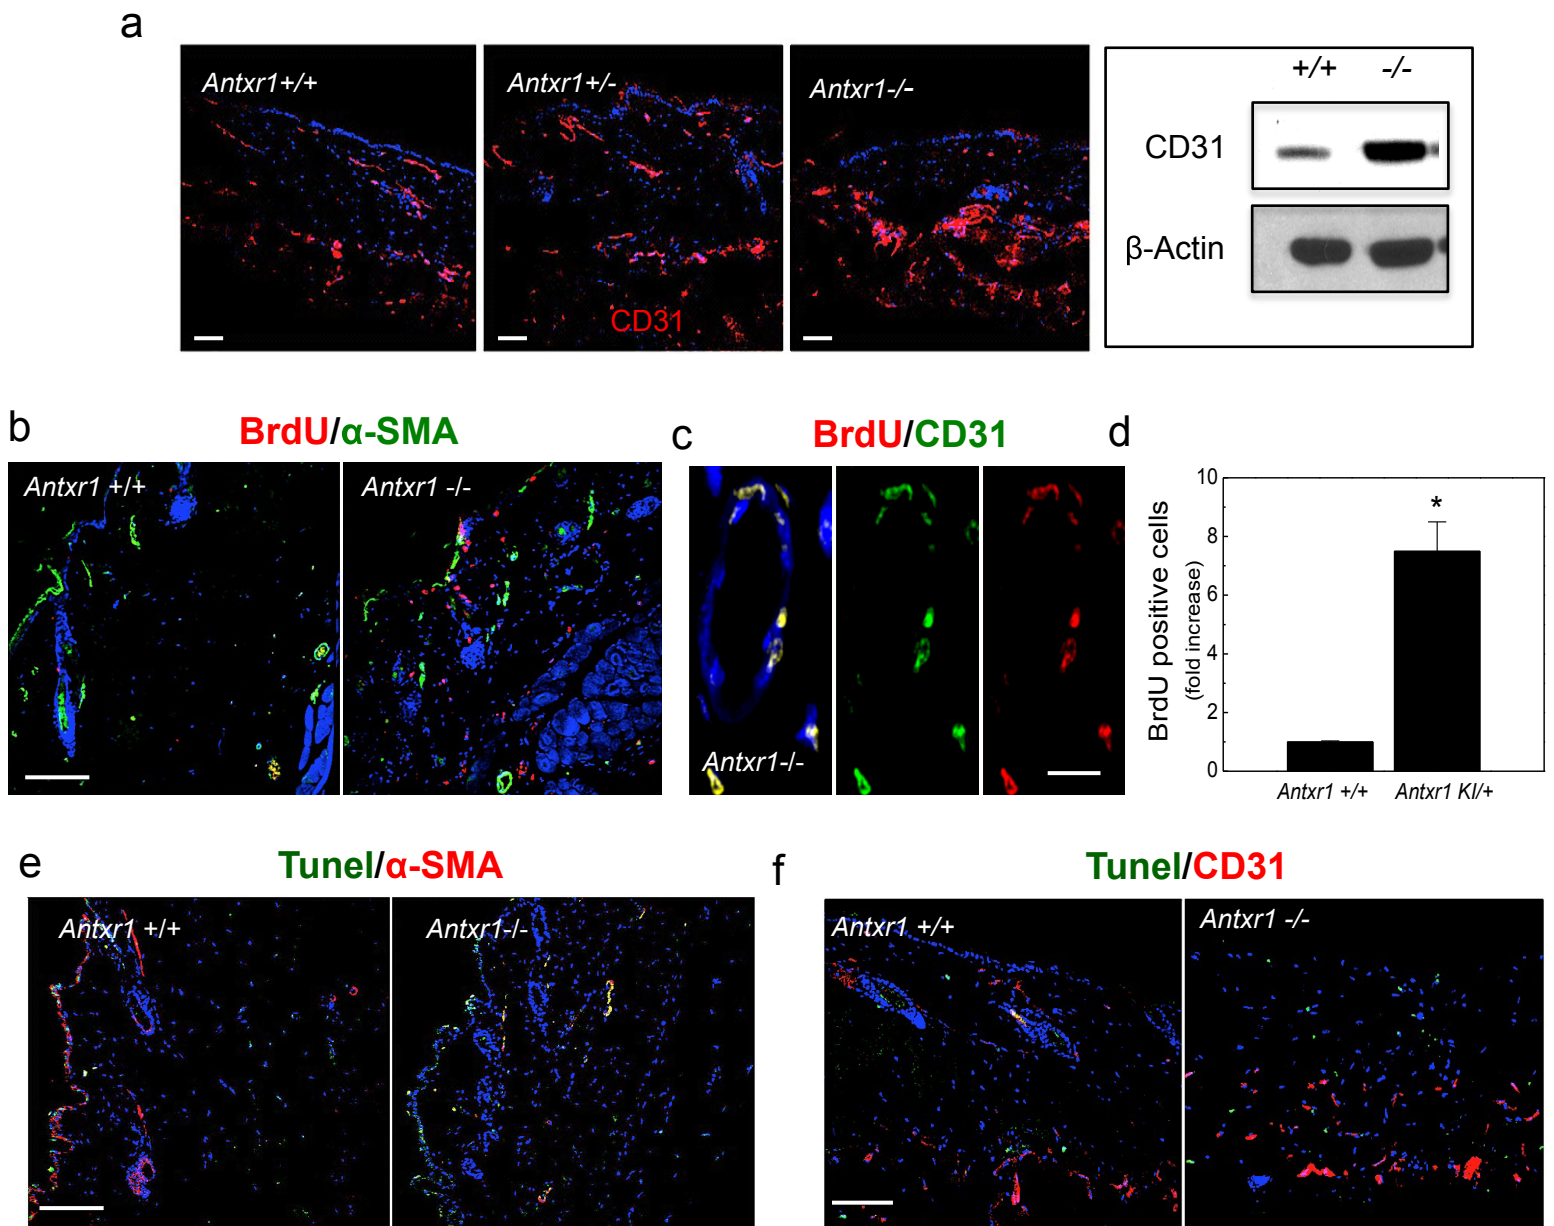

**Supplemental Figure S2: Antxr1<sup>-/-</sup> vasculature is affected by loss of TEM8.**

*Antxr1*<sup>-/-</sup> vasculature is affected by loss of TEM8. (a) Left: Immunostaining for CD31 in skin sections from control and mutant mice. Scale bars 50 μm. Right: Western blot of total skin lysates shows increased level of CD31 in skin of mutant animals. (b) Double BrdU (red)/α-SMA (green) staining of skin sections. The α-SMA positive cells are BrdU negative in control and mutant sections. Scale bar 50 μm. (c) Double BrdU (red)/CD31 (green) staining shows correlation between CD31 and BrdU positive cells in mutant vessels. Scale bar 20 μm. (d) Increased numbers of BrdU positive cells in skin sections of *KI/+* mice (n = 6; (\*P < 0.05)). (e) Double Tunel (green)/α-SMA (red) staining showing colocalization of Tunel- and α-SMA-positive cells (yellow/merged signal) in mutant skin. Scale bar 50 μm. (f) No correlation between CD31 positive cells (red) and Tunel positive cells (green) in skin sections of control and mutant mice. Scale bar 50 μm.

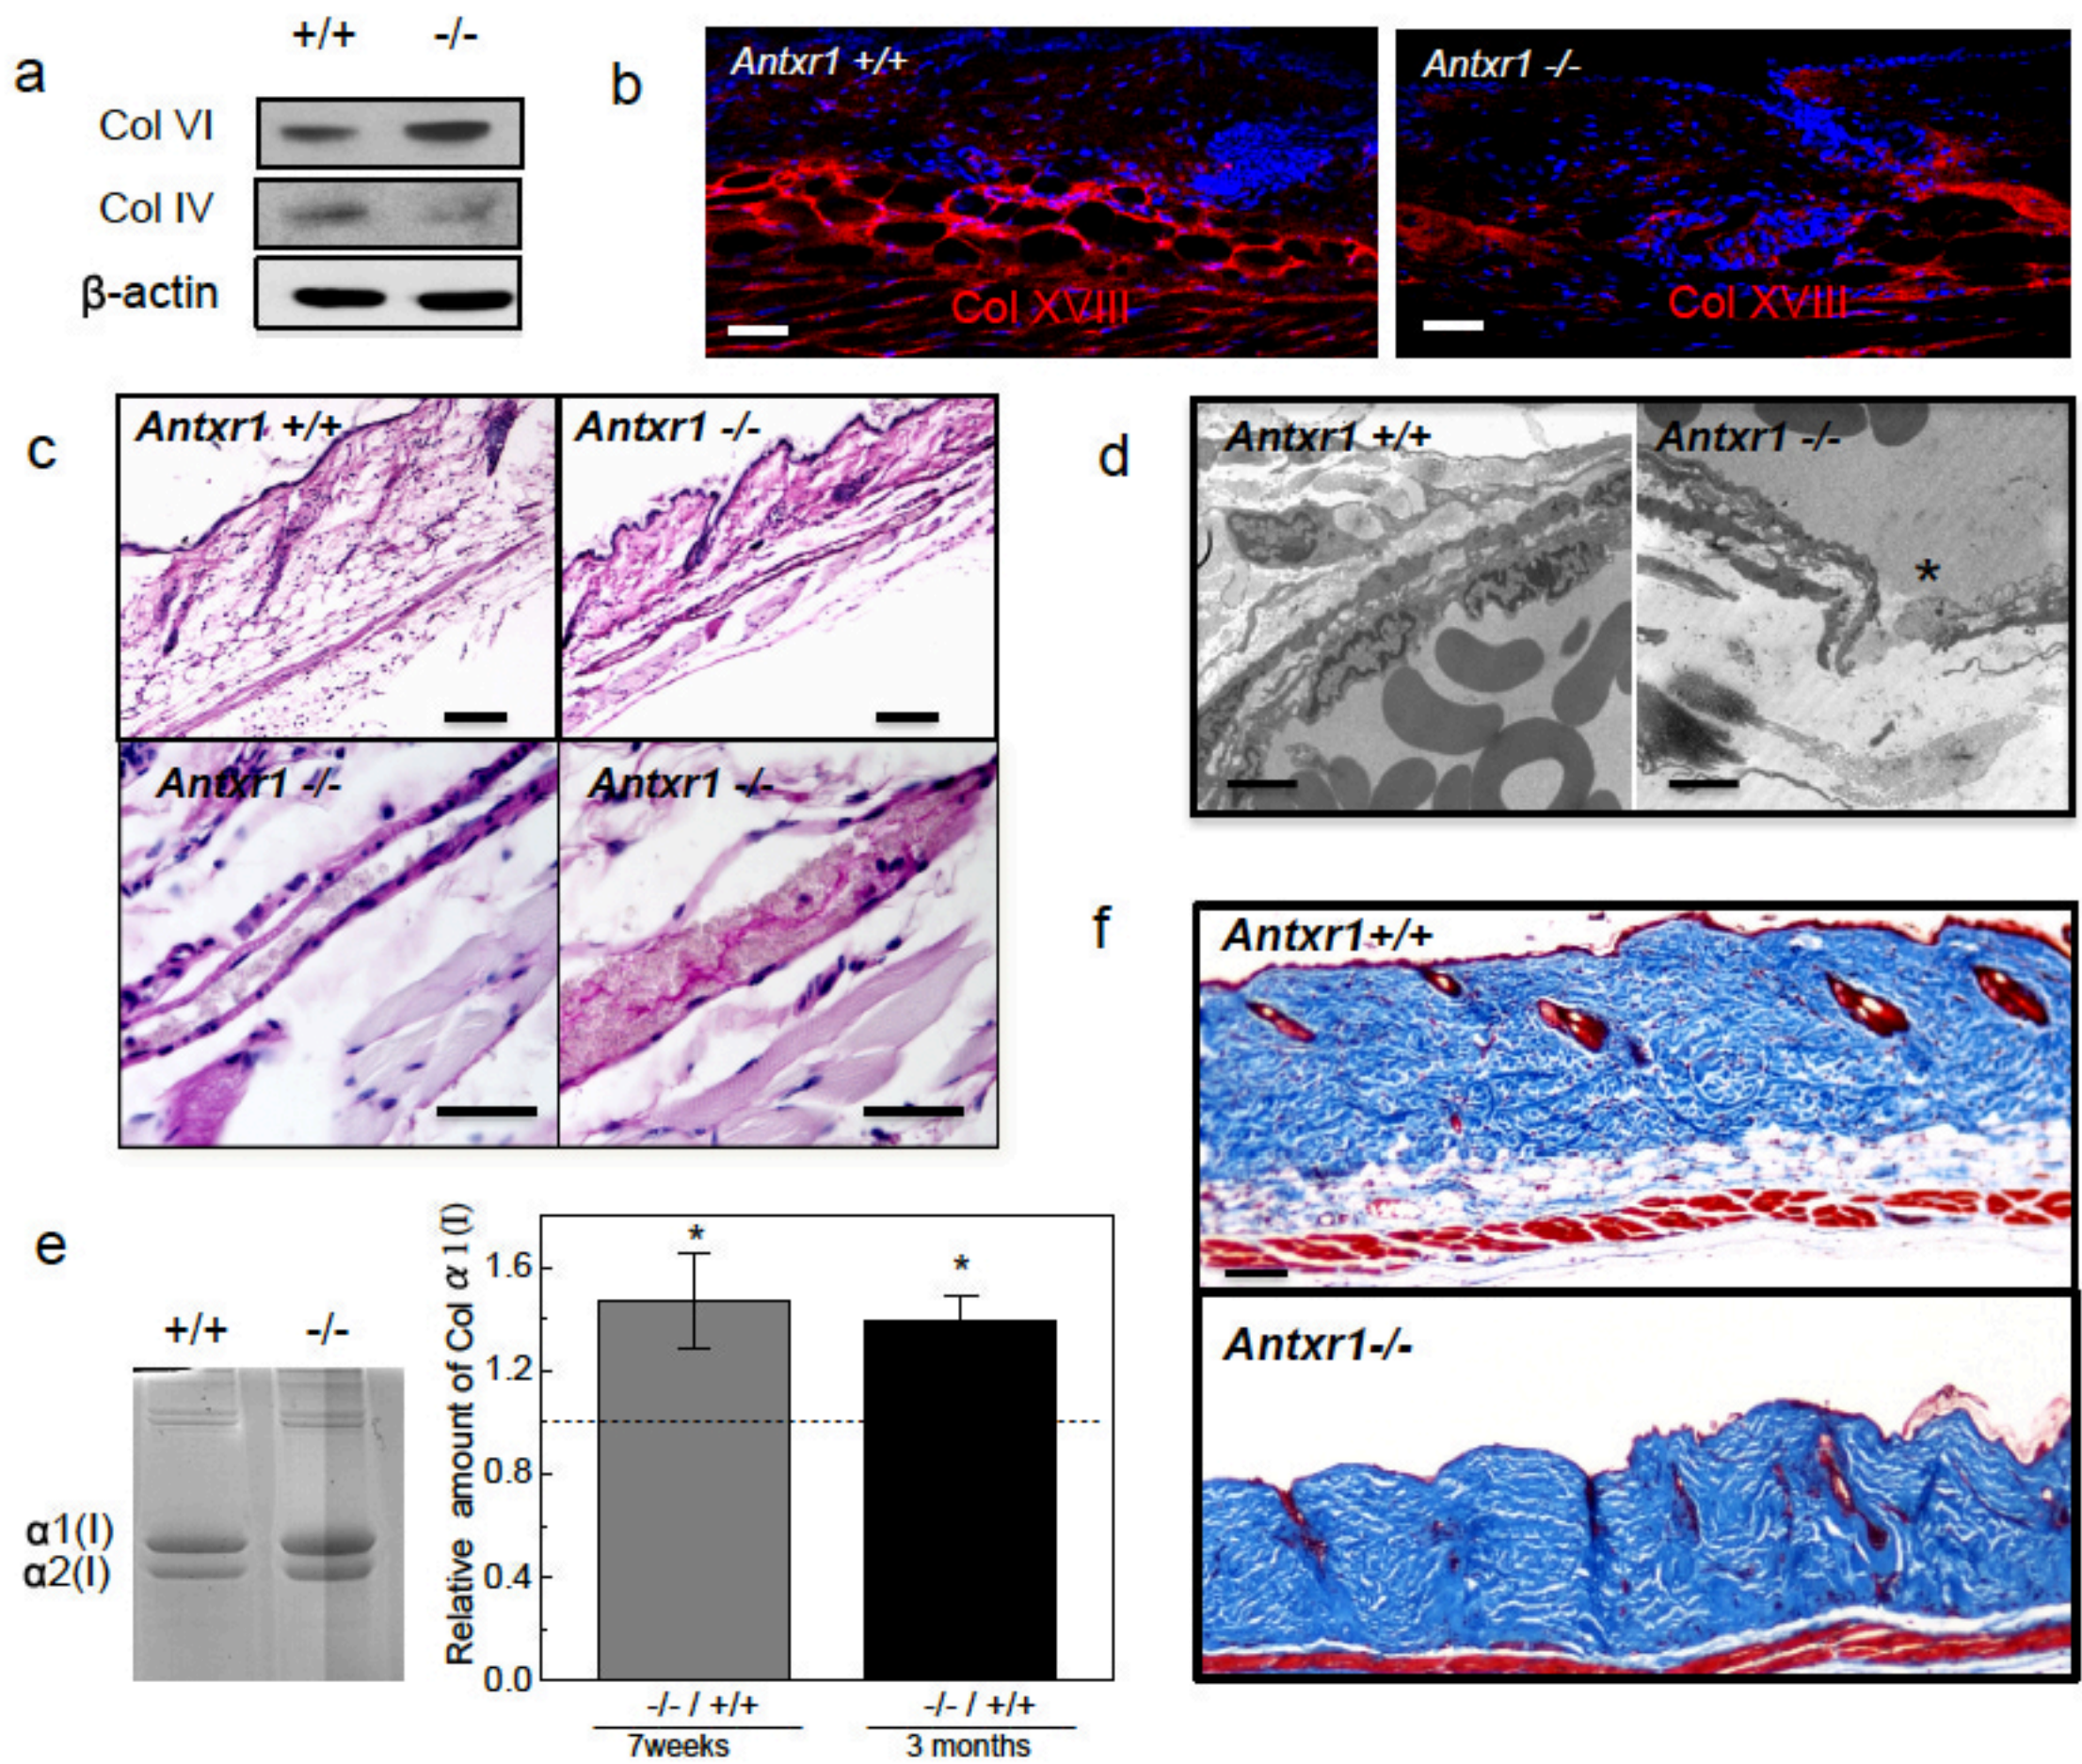

### Supplemental Figure 3: Effect of TEM8 loss on extracellular matrix

(a) Western blotting of total skin lysates shows increased level of collagen VI and reduced level of collagen IV in mutant mice. (b) Reduced immunostaining for collagen XVIII (red) in cutaneous vasculature of mutant mice. Scale bars 50  $\mu$ m. (c) PAS staining shows abnormal thickening of blood vessel walls (top; scale bars 50  $\mu$ m) and accumulation of PAS-stained material in vessels of mutant mice (bottom; scale bars 25  $\mu$ m). (d) Electron microscopy of cutaneous vasculature; star indicates ruptured vessel. Scale bars 500 nm. (e) Left: PAGE of pepsin-resistant extract from skin of control and mutant littermates. Right: Mass spectrometry data for collagen  $\alpha$ 1(I) band in PAGE of pepsin-extracted triple-helical collagen from skin of 7-week and 3-month old control and mutant mice (n=4; \* P< 0.05). (f) Masson's trichrome staining of skin sections of 3-month old control and mutant mice. Scale bar 100  $\mu$ m.

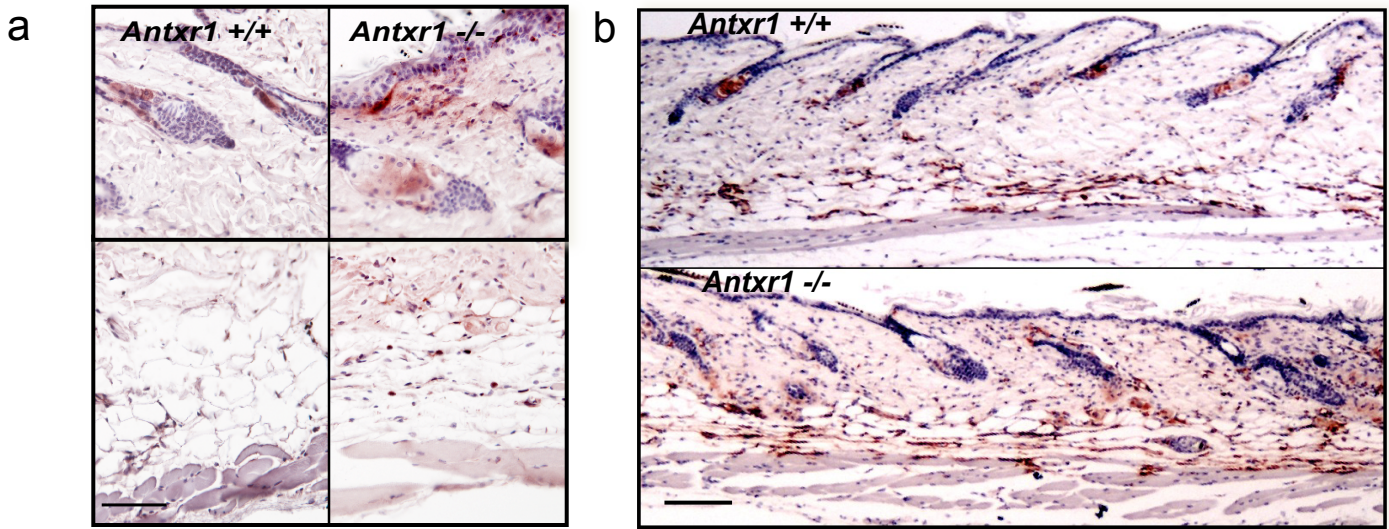

**Supplemental Figure 4: Effect of TEM8 loss on ECM proteolysis**

(a) Immunohistochemical staining of skin sections for MMP9 shows staining in epidermis, hair follicles, sebaceous glands, and in interstitial/dermal cells (Scale bar, 50  $\mu\text{m}$ ). (b) Strong immunohistochemical staining for MMP2 in skin vascular region (Scale bar, 100  $\mu\text{m}$ ).

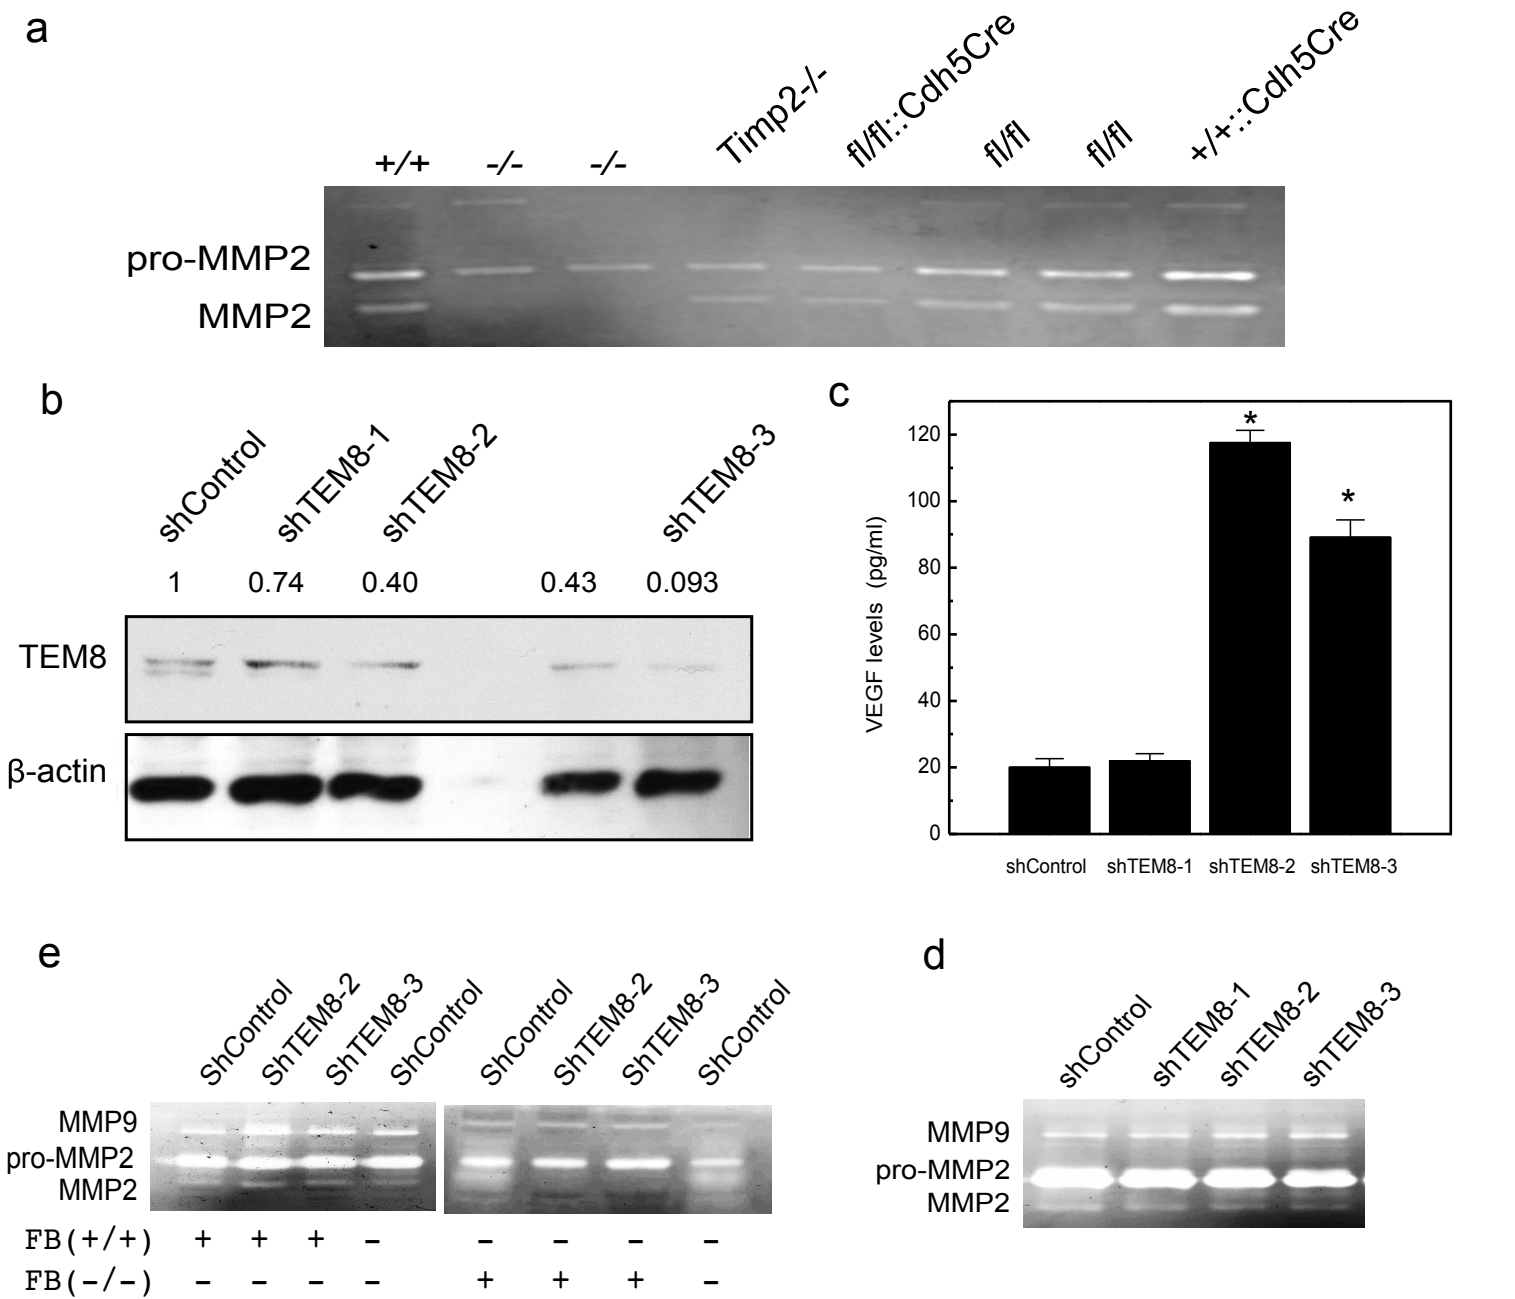

**Supplemental Figure S5: Effect of TEM8 loss on MMP2 activity.**

(a) Gelatin zymography data on which Fig. 6d is based. (b) Western blots of shTEM8-1, shTEM8-2 shTEM8-3 and control endothelial cell lysates with antibodies against TEM8. Relative TEM8 band intensities are shown above. (c) ELISA of secreted levels (pg/ml) of VEGF in shTEM8-1, shTEM8-2 shTEM8-3 and control shTEM8 endothelial cell lines (n = 3; \* P < 0.05). (d) Representative gelatin zymography data of lysates of shTEM8-1, shTEM8-2, shTEM8-3 and shControl endothelial cell lines on which Fig. 7b is based. (e) Representative zymogram on which Fig. 7c is based.

f

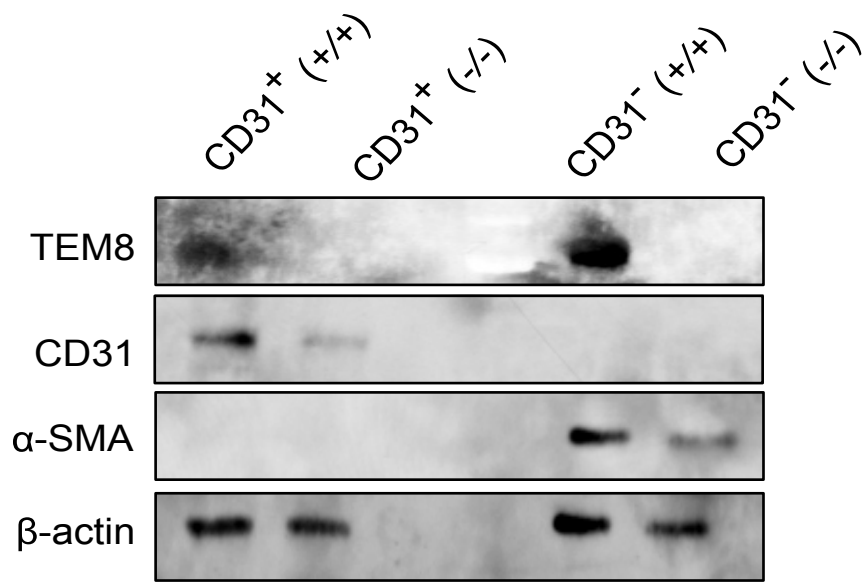

g

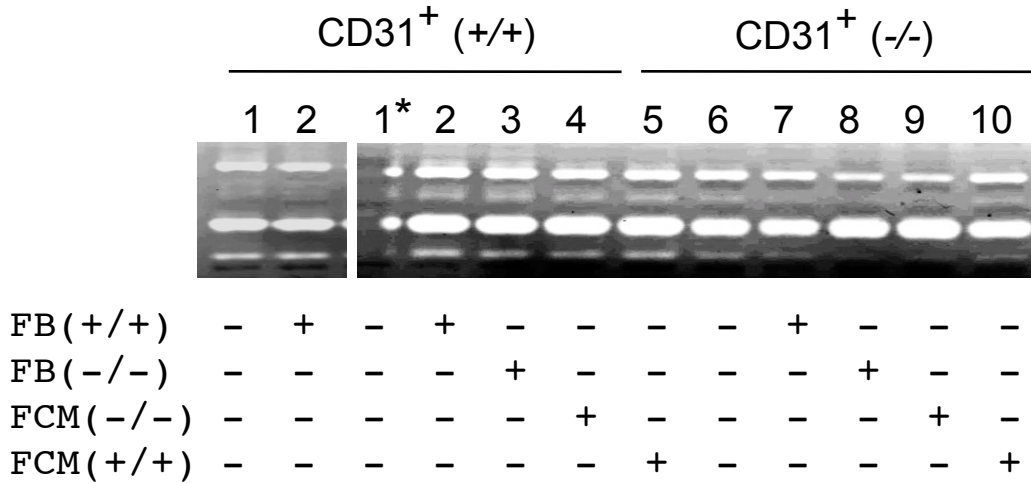

h

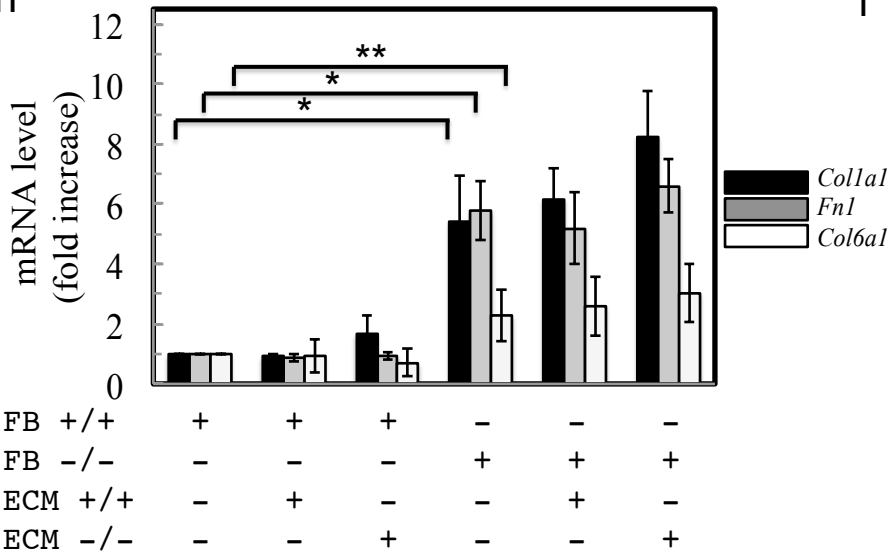

i

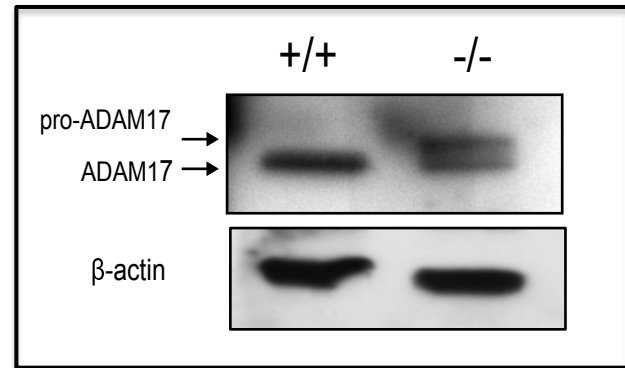

### Supplemental Figure S5: Effect of TEM8 loss on MMP2 activity

(f) Immunoblotting with antibody against TEM8 of lysates of primary CD31-positive ( $CD31^+$ ) and CD31-negative ( $CD31^-$ ) cells isolated from skin of 7-week old *Antxr1*<sup>+/+</sup> and *Antxr1*<sup>-/-</sup> mice. The purity of  $CD31^+$  positive and  $CD31^-$  negative cells confirmed by western blotting with antibodies against CD31 and  $\alpha$ -SMA. (g) Gelatin zymography data, on which Fig. 7d is based, of lysates of primary endothelial ( $CD31^+$ ) cells from *Antxr1*<sup>+/+</sup> and *Antxr1*<sup>-/-</sup> mice either co-cultured with fibroblasts (FB) from *Antxr1*<sup>+/+</sup> or *Antxr1*<sup>-/-</sup> mice or exposed to conditioned medium (FCM) from such fibroblasts. Because of technical problem with lane 1 (\*), lanes 1 and 2 from a different gel are shown at left. (h) Transcript levels of *Coll1a1*, *Col6a1* and *Fn1* in *Antxr1*<sup>+/+</sup> and *Antxr1*<sup>-/-</sup> fibroblasts (FB +/+ and FB -/-) cultured in conditioned media of wild type (ECM +/+) or mutant (ECM -/-)  $CD31^+$  cells (n = 4; \*P < 0.05, \*\*P < 0.005). (i) Western blotting of ADAM17 in total skin lysates of 7-week old mutant and control mice.

**Supplemental Table S1**

| Gene               | Forward primer 5'-       | Reverse primer 5'-        |
|--------------------|--------------------------|---------------------------|
| <i>Vegfr1</i>      | CTCAGGGTCGAAGTTAAAAGTGC  | TTGCCTGTTATCCCTCCCACA     |
| <i>Vegfr2</i>      | TCCAGAATCCTCTTCCATGC     | CCAGAGACCCTCGTTTTTCAG     |
| <i>Tie2</i>        | CAGCTTGCTCCTTTATGGAGTAG  | ATCAGACACAAGAGGTAGGGAAT   |
| <i>Itgb1</i>       | ATGCCAAATCTTGCGGAGAAT    | TTTGCTGCGATTGGTGACATT     |
| <i>Vegfa</i>       | GGAGATCCTTCGAGGAGCACTT   | GGCGATTTAGCAGCAGATATAAGAA |
| <i>Vegfb</i>       | GGCAACACCAAGTCCGAATG     | GCTGTGTTCTTCCAGGGACATC    |
| <i>Vegfc</i>       | GGCTGCTCCAAACTCCTTC      | CTCAATACCAGGACAGGGGA      |
| <i>Angpt1</i>      | CATTCTTCGCTGCCATTCTG     | GCACATTGCCCATGTTGAATC     |
| <i>Angpt2</i>      | TGCACCACATTCTGTTGGAT     | GACGACTCAGTGCAAAGGCT      |
| <i>Col6a1</i>      | CATGGTTCCTTGTAGCCCTC     | CAAGTACTTCGGGAAAGGCA      |
| <i>Col6a2</i>      | CATCGGTGACATGTTCCACG     | TGAGGAAGACGAAGGAGAGC      |
| <i>Col6a3</i>      | TCTTCAGCAACAAGCCCACC     | ACTGGAACAGTGTGGTAGCC      |
| <i>Col6a4</i>      | TCGCATTATTCGTGCTCGCC     | GCCTACACCATGTCTCACACTC    |
| <i>Col6a5</i>      | GCTCAGTGATTGACAGCTTCC    | GTGTGTCTCCCTCTCTAACTC     |
| <i>Col6a6</i>      | TTCTCAGCCTACAACCTG       | CCAACAGGAACACCACATCAG     |
| <i>Col1a1</i>      | GGTTCCACGTCTCACCATT      | CGGCTCCTGCTCCTCTTAG       |
| <i>Col18a1</i>     | CTCATCAGGACTTTCAGCCAGT   | CTGACCTGTAGCCCAGTAGTT     |
| <i>Col4a1</i>      | CAAGCATAGTGGTCCGAGTC     | AGGCAGGTCAAGTTCTAGCG      |
| <i>Lama5</i>       | TGCCCTCTCCAAGAGGGATTGTTT | TTCGCGAGTATTCTGTGGTGCAGA  |
| <i>Fn1</i>         | ACTGGATGGGGTGGGAAT       | GGAGTGGCACTGTCAACCTC      |
| <i>Col3a1</i>      | TGCCACAGCCTTCTACACCT     | CCAGCTGGGCCTTTGATACCT     |
| <i>Col2a1</i>      | GTGTCACACACACAGATGCG     | CTACGGTGTGAGGGCCAG        |
| <i>Mmp2</i>        | GCGCTTTTCTCGAATCCAT      | GGGTATCCATCTCCATGCTC      |
| <i>Mmp9</i>        | ACGACATAGACGGCATCCA      | GCTGTGGTTCAGTTGTGGTG      |
| <i>Timp1</i>       | TGGGGAACCCATGAATTTAG     | ATCTGGCATCCTCTTGTGTC      |
| <i>Timp2</i>       | GAATCCTCTTGATGGGGTTG     | CGTTTTGCAATGCAGACGTA      |
| <i>Timp3</i>       | GCTTCTTTCCCACTTTG        | GTGCTCCTGAGCTGTTGGA       |
| <i>Cxcl12</i>      | CAGAGCCAACGTCAAGCA       | AGGTACTCTTGATCCAC         |
| <i>Cxcr4</i>       | AGCATGACGGACAAGTACC      | GATGATATGGACAGCCTTACAC    |
| <i>Cxcl12 (h)*</i> | TGCCAGAGCCAACGTCAAG      | CAGCCGGGCTACAATCTGAA      |
| <i>Cxcr4 (h)*</i>  | TGACGGACAAGTACAGGCTGC    | CCAGAAGGGAAGCGTGATGA      |
| <i>Gapdh</i>       | TGGCAAAGTGGAGATTGTTGCC   | AAGATGGTGATGGGCTCCCG      |

(h)\* human
